# Supplementary material for: rnaSPAdes: a de novo transcriptome assembler and its application to RNA-Seq data
Source: PubMed Central journal article supplement (PMC6736328; doi:10.1093/gigascience/giz100), 2019-09-03
Supplement: giz100_response_to_reviewer_comments_revision_2.pdf [file giz100_response_to_reviewer_comments_revision_2.pdf]

## Author's Response To Reviewer Comments

Close

Dear Hans Zauner,

We have added the reference to GigaDB dataset and cited it in data availability section as instructed.

Best regards  
Andrey

Close
