# Supplementary material for: rnaSPAdes: a de novo transcriptome assembler and its application to RNA-Seq data
Source: PubMed Central journal article supplement (PMC6736328; doi:10.1093/gigascience/giz100), 2019-09-03
Supplement: giz100_supplemental_file.pdf [file giz100_supplemental_file.pdf]

# Supplementary Material: rnaSPAdes: a *de novo* transcriptome assembler and its application to RNA-Seq data

Elena Bushmanova<sup>1</sup>, Dmitry Antipov<sup>1</sup>, Alla Lapidus<sup>1</sup>, and Andrey D. Prjibelski<sup>1,\*</sup>

<sup>1</sup>Center for Algorithmic Biotechnology, Institute of Translational Biomedicine, St. Petersburg State University, St. Petersburg, Russia

## S1 Transcriptome assembly quality evaluation

To assess quality of the assembled transcripts we used rnaQUAST (Bushmanova *et al.*, 2016), Transrate (Smith-Unna *et al.*, 2016) and DETONATE package (Li *et al.*, 2014), which were designed specifically for evaluating *de novo* transcriptome assemblies. While rnaQUAST focuses on the reference-based assessment and is useful for testing and benchmarking assemblies on organisms with known genomes sequences and gene database, the latter two tools are also capable of analyzing assemblies using only input reads. Since these tools produce reports containing a lot of various statistics, we selected only a few most significant metrics from each tool.

From rnaQUAST report we decided to select the following metrics:

- Transcripts — the total number of contigs generated by the assembler.
- Duplication ratio — the proportion of overlapping bases among transcripts assigned to the same isoform from the gene database. Since typically a significant fraction of isoforms may not express in the sequenced tissue, rnaQUAST counts only bases that are covered by at least one transcript, thus making an ideal value of the duplication ratio equal to 1. Higher values may reflect the presence of redundant transcripts reported by the assembler.
- Misassemblies — the number of transcripts with discordant alignments, e.g. partial alignments to different loci. A misassembly is reported only if it is confirmed by contig's alignments to the genome (with GMAP) and to the transcriptome (with BLASTN).
- Database coverage — the fraction of nucleotides from all database isoforms covered by all assembled transcripts.
- X% assembled genes/isoforms — the number of genes/isoforms that have at least X% captured by a *single* reported transcript. In case if several transcripts are assigned to a single gene/isoform, rnaQUAST selects the one with the best match.

We also decided to complement rnaQUAST report by the following reference-based Transrate metrics:

- P references with CRBB — the proportion of reference proteins having a CRB-BLAST hit to the assembled transcripts.
- Reference coverage — the proportion of reference protein bases covered by CRB-BLAST hits (correlates with rnaQUAST database coverage).

---

\*To whom correspondence should be addressed. Andrey Prjibelski, e-mail: a.przhibelsky@spbu.ru

- 50% covered / 95% covered — the number of reference sequences with at least 50%/95% of their bases covered by all CRB-BLAST hits (correlates with rnaQUAST 50%-covered / 95%-covered isoforms).

We also added several metrics reported by REF-EVAL from DETONATE package (see Li *et al.* (2014) for details):

- precision, recall and  $F1$ -score at the contig/nucleotide level;
- $k$ -mer recall and  $k$ -mer compression score (KC score).

Even though the benchmarks are performed on the organisms with high-quality reference genomes, we decided to provide several *de novo* metrics. Along with RSEM-EVAL score, we also include the following statistics obtained with Transrate:

- Contigs segmented — number of segmented sequences (i.e. potentially misassembled contigs);
- P bases uncovered — the proportion of transcript bases that are not covered by any reads;
- Contig score — a measure of how well the contigs are supported by read evidence;

In addition, we present the number of missing, fragmented and complete (both single-copy and duplicated) universal single-copy orthologs reported by BUSCO (Simão *et al.*, 2015) as bar plots (Figure S2).

## S2 Tools versions used in this work

- BinPacker 1.0 (Liu *et al.*, 2016)
- Bridger 2014-12-01 (Chang *et al.*, 2015)
- IDBA-tran 1.1.3 (Peng *et al.*, 2013)
- RNA-Bloom 0.9.8 (Nip, 2017)
- SOAPdenovo-Trans 1.04 (Xie *et al.*, 2014)
- Trans-ABYSS 2.0.1 (Robertson *et al.*, 2010)  
BLAT 36 (Kent, 2002)
- Trinity 2.6.6 (Grabherr *et al.*, 2011)  
Jellyfish 2.2.8 (Marçais and Kingsford, 2011)  
Salmon 0.9.1 (Patro *et al.*, 2017)  
Bowtie 2.3.4.1 (Langmead and Salzberg, 2012)
- rnaSPAdes and SPAdes from SPAdes 3.13.1 package
- rnaQUAST 1.5.2 (Bushmanova *et al.*, 2016)  
GMAP 2018-03-25 (Wu and Watanabe, 2005)  
BLAST package 2.6.0 (Camacho *et al.*, 2009)
- Transrate 1.0.3 (Smith-Unna *et al.*, 2016)  
Salmon 0.9.1 (Patro *et al.*, 2017)  
BLAST package 2.6.0 (Camacho *et al.*, 2009)  
SNAP aligner 1.0dev.96 (Zaharia *et al.*, 2011)

- DETONATE 1.10 (Li *et al.*, 2014)  
Bowtie 2.3.4.1 (Langmead and Salzberg, 2012)  
BLAT 36 (Kent, 2002)
- BUSCO 3.0.1 (Simão *et al.*, 2015)
- FastQC 0.11.7 (Andrews *et al.*, 2010)
- Trimmomatic 0.35 (Bolger *et al.*, 2014)
- kallisto 0.44.0 (Bray *et al.*, 2016)
- GeneMarkS-T 5.1 (Tang *et al.*, 2015)

## S3 Command lines for running the tools

### Quality control and preprocessing

- FastQC  
`fastqc left.fastq right.fastq`
- Trimmomatic  
`TrimmomaticPE left.fastq right.fastq -baseout trimmed.fastq LEADING:3 TRAILING:3 SLIDINGWINDOW:4:15 MINLEN:35`

### RSEM simulation based on real RNA-Seq

See <https://github.com/deweylab/RSEM#simulation> for recommendations.

```
rsem-prepare-reference --gtf gene_database.gtf --bowtie2 reference_genome.fa reference_label
rsem-calculate-expression --bowtie2 --paired-end left.fastq right.fastq reference_label sample_name
rsem-simulate-reads reference_label sample_name.stat/sample_name.model sample_name.isoforms.results
sample_name.stat/sample_name.theta NR simulated_reads
```

### Assemblers

- Trans-ABBySS  
For non-strand-specific data  
`transabyss --pe left.fastq right.fastq --threads 16 --length 200 --outdir OUTPUT_DIR`  
For strand-specific data we used `--SS` option.
- IDBA-tran  
`fq2fa --merge --filter left.fastq right.fastq reads.fastq`  
`idba_tran -r reads.fastq -o OUTPUT_DIR --num_threads 16 --min_contig 200`
- SOAPdenovo-Trans  
`soap.config:`  
`max_rd_len=RL`  
`[LIB]`  
`avg_ins=INSERT_SIZE`  
`q1=left.fastq`  
`q2=right.fastq`  
  
`SOAPdenovo-Trans-31mer all -s soap.config -p 16 -L 200 -o OUTPUT_DIR/SOAP`  
*Note: scaffold sequences were used for the evaluation.*

- Trinity

For non-strand-specific data

```
Trinity --seqType fq --max_memory 200G --left left.fastq --right right.fastq --CPU 16
--min_contig_length 200 --output OUTPUT_DIR
```

For strand-specific data we used `--SS_lib_type RF` option.

- rnaSPAdes

For non-strand-specific data

```
spades.py --rna -1 left.fastq -2 right.fastq -t 16 -o OUTPUT_DIR
```

For strand-specific data we used `--ss-rf` option.

- SPAdes

```
spades.py --sc -1 left.fastq -2 right.fastq -t 16 -o OUTPUT_DIR
```

*Note: scaffold sequences were used for the evaluation.*

- BinPacker

For non-strand-specific data

```
BinPacker -d -q -s fq -p pair -l left.fastq -r right.fastq -o OUTPUT_DIR
```

For strand-specific data we used `-m RF` option.

- Bridger

For non-strand-specific data

```
Bridger.pl --seqType fq --left left.fastq --right right.fastq --output OUTPUT_DIR --CPU
16
```

For strand-specific data we used `--SS_lib_type RF` option.

- RNA-bloom

For non-strand-specific data

```
java -jar RNA-Bloom.jar -left left.fastq -right right.fastq -revcomp-right -t 16 -length
200 -outdir OUTPUT_DIR
```

For strand-specific data we used `-stranded` option. For anti-sense data the resulting sequences were reverse-complemented since RNA-Bloom does not support strandness type.

## Quality evaluation

- rnaQUAST

```
rnaQUAST.py --transcripts transcripts_1.fa transcripts_2.fa ... --reference reference_genome.fa
--gtf gene_database.gtf --output_dir OUTPUT_DIR --disable_infer_genes --disable_infer_transcripts
--gene_mark
```

- DETONATE

*See <http://deweylab.biostat.wisc.edu/detonate/vignette.html> for recommendations.*

```
rsem-eval-estimate-transcript-length-distribution isoforms.fa species.txt
```

```
rsem-eval-calculate-score --paired-end left.fastq right.fastq transcripts.fa rsem_eval.transcripts
RL --transcript-length-parameters species.txt -p 16
rsem-prepare-reference --bowtie isoforms.fa rsem_ref
rsem-calculate-expression --paired-end left.fastq right.fastq -p 16 rsem_ref rsem_expr
ref-eval-estimate-true-assembly --reference rsem_ref --expression rsem_expr --assembly
ta --alignment-policy best
```

```

rsem-prepare-reference --bowtie ta_0.fa ta_0_ref
rsem-calculate-expression -p 16 --paired-end left.fastq right.fastq ta_0_ref ta_0_expr

ref-eval --scores kc --A-seqs transcripts.fa --B-seqs ta_0.fa --B-expr ta_0_expr.isoforms.results
--kmerlen RL --readlen RL --num-reads NR | tee kc_transcripts.txt

blat -minIdentity=80 ta_0.fa transcripts.fa transcripts_to_ta_0.psl
blat -minIdentity=80 transcripts.fa ta_0.fa ta_0_to_transcripts.psl

ref-eval --scores contig,nucl --weighted no --A-seqs transcripts.fa --B-seqs ta_0.fa --A-to-B
transcripts_to_ta_0.psl --B.to.A ta_0_to_transcripts.psl --min-frac-identity 0/90 | tee
contig_nucl_transcripts.txt

```

*Note: for Z.mays dataset we had to change detonate according to the authors suggestion given here:  
<https://groups.google.com/forum/#!topic/detonate-users/IzfXjVttDPg>*

- Transrate

```

transrate --assembly transcripts_1.fa,transcripts_2.fa,... --left left.fastq --right right.fastq
--reference peptides_database.fasta --threads 16 --output OUTPUT_DIR

```
- BUSCO

```

run_BUSCO.py -i transcripts.fa -o OUTPUT_DIR -l BUSCO_LINEAGE_DATA -m tran

```
- kallisto

For non-strand-specific data

```

kallisto index -i isoforms.idx isoforms.fa
kallisto quant -i isoforms.idx -o kallisto_quant -b 100 left.fastq right.fastq --threads
16

```

For strand-specific data we used --rf-stranded option.

## S4 Quality reports

Table S1: Benchmarking of **BinPacker**, **Bridger**, **IDBA-tran**, **RNA-Bloom**, **rnaSPAdes**, **SOAPdenovo-Trans**, **SPAdes**, **Trans-ABYSS** and **Trinity** on Human simulated RNA-seq dataset. All contigs shorter than 200 bp were filtered out prior to the analysis. The annotated transcriptome of *H. sapiens* GRCh38.82 consists of 57820 genes and 196520 isoforms. The best values for each metric are highlighted with bold.

| Assembler                            | BinPacker | Bridger | IDBA        | Bloom        | rnaSPAdes    | SOAP  | SPAdes      | ABYSS      | Trinity     |
|--------------------------------------|-----------|---------|-------------|--------------|--------------|-------|-------------|------------|-------------|
| Options                              |           |         |             |              |              |       | --sc        |            |             |
| K                                    | 25        | 25      | 20-60       |              | 49, 73       | 23    | 21, 33, 55  | 32         | 25          |
| <b>rnaQUAST metrics</b>              |           |         |             |              |              |       |             |            |             |
| Transcripts                          | 76736     | 52151   | 58466       | 65968        | 37730        | 35096 | 42264       | 67511      | 62831       |
| Misassemblies                        | 7919      | 3512    | 174         | 358          | 309          | 198   | 443         | <b>126</b> | 1554        |
| Duplication ratio                    | 2.19      | 1.38    | 1.01        | 1.93         | 1.26         | 1.08  | <b>1.00</b> | 1.24       | 1.74        |
| Database coverage, %                 | 20.9      | 18.5    | 21.4        | <b>24.6</b>  | 23.2         | 19.4  | 20.5        | 23.1       | 24.4        |
| 50%-assembled genes                  | 11828     | 11476   | 13175       | 12869        | <b>14075</b> | 12610 | 13569       | 12740      | 13289       |
| 95%-assembled genes                  | 7320      | 6417    | 2729        | 8910         | <b>10934</b> | 7685  | 8526        | 7225       | 9049        |
| 50%-assembled isoforms               | 17415     | 15423   | 18181       | <b>21035</b> | 19531        | 15638 | 16437       | 19250      | 20965       |
| 95%-assembled isoforms               | 9091      | 7298    | 2744        | 12108        | <b>13387</b> | 8151  | 8638        | 7662       | 12301       |
| <b>Detonate scores</b>               |           |         |             |              |              |       |             |            |             |
| Nucleotide precision                 | 0.39      | 0.68    | <b>0.94</b> | 0.47         | 0.74         | 0.87  | 0.93        | 0.73       | 0.52        |
| Nucleotide recall                    | 0.84      | 0.79    | 0.72        | 0.85         | 0.82         | 0.68  | 0.73        | 0.74       | <b>0.87</b> |
| Nucleotide F1                        | 0.54      | 0.73    | 0.81        | 0.61         | 0.78         | 0.76  | <b>0.82</b> | 0.73       | 0.65        |
| Contig precision                     | 0.09      | 0.128   | 0.085       | 0.137        | <b>0.232</b> | 0.214 | 0.177       | 0.117      | 0.128       |
| Contig recall                        | 0.057     | 0.054   | 0.04        | <b>0.074</b> | 0.071        | 0.061 | 0.061       | 0.064      | 0.066       |
| Contig F1                            | 0.07      | 0.08    | 0.055       | 0.096        | <b>0.109</b> | 0.095 | 0.091       | 0.083      | 0.087       |
| <i>k</i> -mer recall                 | 0.96      | 0.94    | 0.68        | <b>0.99</b>  | 0.97         | 0.86  | 0.91        | 0.95       | 0.97        |
| KC score                             | 0.91      | 0.92    | 0.66        | <b>0.95</b>  | <b>0.95</b>  | 0.85  | 0.9         | 0.93       | 0.93        |
| RSEM-EVAL score ( $\times 10^9$ )    | -1.92     | -2.08   | -5.65       | <b>-1.43</b> | -1.48        | -2.98 | -2.65       | -2.02      | -1.71       |
| <b>Transrate comparative metrics</b> |           |         |             |              |              |       |             |            |             |
| Contig score                         | 0.00      | 0.09    | 0.16        | 0.03         | 0.15         | 0.14  | <b>0.25</b> | 0.10       | 0.05        |
| P bases uncovered                    | 0.78      | 0.43    | <b>0.02</b> | 0.66         | 0.37         | 0.15  | <b>0.02</b> | 0.33       | 0.64        |
| Contigs segmented                    | 5520      | 4860    | 3097        | 10521        | 6006         | 3513  | <b>2356</b> | 6513       | 6679        |
| P references with CRBB               | 0.19      | 0.17    | 0.20        | <b>0.21</b>  | 0.17         | 0.13  | 0.16        | 0.20       | 0.20        |
| Reference coverage                   | 0.25      | 0.23    | 0.18        | <b>0.27</b>  | 0.23         | 0.17  | 0.18        | 0.23       | <b>0.27</b> |
| 50% covered                          | 17862     | 15637   | 14625       | <b>19149</b> | 15819        | 11959 | 13133       | 16686      | 19005       |
| 95% covered                          | 14492     | 12350   | 5338        | <b>16007</b> | 13057        | 7808  | 8747        | 11952      | 15696       |

Table S2: Benchmarking of **BinPacker**, **Bridger**, **IDBA**-tran, **RNA-Bloom**, **rnaSPAdes**, **SOAPdenovo-Trans**, **SPAdes**, **Trans-ABYSS** and **Trinity** on Mouse simulated RNA-seq dataset. All contigs shorter than 200 bp were filtered out prior to the analysis. The annotated transcriptome of *M. musculus* GRCm38.75 consists of 38924 genes and 94545 isoforms. The best values for each metric are highlighted with bold.

| Assembler                            | BinPacker |       |       |             | Bridger  |              | IDBA        | Bloom       | rnaSPAdes | SOAP        | SPAdes     |    |    | ABYSS | Trinity |
|--------------------------------------|-----------|-------|-------|-------------|----------|--------------|-------------|-------------|-----------|-------------|------------|----|----|-------|---------|
|                                      | Options   | 25    | 25    | 25          | 25       | 20-60        | 25          | 33, 49      | 23        | 21, 33, 55  | 21, 33, 55 | 32 | 32 | 25    |         |
| <b>rnaQUAST metrics</b>              |           |       |       |             |          |              |             |             |           |             |            |    |    |       |         |
| Transcripts                          |           | 24099 | 36945 | 34431       | 21908    | 35053        | 25535       | 38044       | 25761     | 43858       |            |    |    |       |         |
| Misassemblies                        |           | 3732  | 425   | 208         | <b>5</b> | 30           | 15          | 141         | 12        | 162         |            |    |    |       |         |
| Duplication ratio                    |           | 1.74  | 1.09  | 1.01        | 1.25     | 1.06         | <b>1.00</b> | 1.01        | 1.07      | 1.16        |            |    |    |       |         |
| Database coverage, %                 |           | 6.5   | 13.6  | 14.9        | 6.9      | 15.9         | 11.2        | <b>17.4</b> | 10.3      | 16.2        |            |    |    |       |         |
| 50%-assembled genes                  |           | 3001  | 4888  | 5485        | 2981     | 6108         | 4696        | <b>6514</b> | 4186      | 5756        |            |    |    |       |         |
| 95%-assembled genes                  |           | 1461  | 2567  | 2279        | 1302     | 3705         | 2226        | <b>3916</b> | 2151      | 3279        |            |    |    |       |         |
| 50%-assembled isoforms               |           | 3249  | 5135  | 5712        | 3299     | 6395         | 4811        | <b>6712</b> | 4570      | 6396        |            |    |    |       |         |
| 95%-assembled isoforms               |           | 1505  | 2640  | 2280        | 1386     | 3774         | 2229        | <b>3921</b> | 2190      | 3482        |            |    |    |       |         |
| <b>Detonate scores</b>               |           |       |       |             |          |              |             |             |           |             |            |    |    |       |         |
| Nucleotide precision                 |           | 0.51  | 0.85  | 0.92        | 0.78     | 0.89         | <b>0.96</b> | 0.9         | 0.89      | 0.77        |            |    |    |       |         |
| Nucleotide recall                    |           | 0.35  | 0.65  | 0.66        | 0.31     | 0.7          | 0.51        | <b>0.76</b> | 0.46      | 0.7         |            |    |    |       |         |
| Nucleotide F1                        |           | 0.41  | 0.73  | 0.77        | 0.44     | 0.78         | 0.67        | <b>0.82</b> | 0.61      | 0.73        |            |    |    |       |         |
| Contig precision                     |           | 0.074 | 0.12  | 0.135       | 0.081    | <b>0.174</b> | 0.141       | 0.155       | 0.118     | 0.123       |            |    |    |       |         |
| Contig recall                        |           | 0.016 | 0.041 | 0.043       | 0.016    | <b>0.056</b> | 0.033       | 0.054       | 0.028     | 0.049       |            |    |    |       |         |
| Contig F1                            |           | 0.027 | 0.061 | 0.065       | 0.027    | <b>0.084</b> | 0.053       | 0.08        | 0.045     | 0.07        |            |    |    |       |         |
| <i>k</i> -mer recall                 |           | 0.9   | 0.9   | 0.27        | 0.91     | 0.92         | 0.74        | 0.56        | 0.9       | <b>0.95</b> |            |    |    |       |         |
| KC score                             |           | 0.87  | 0.88  | 0.25        | 0.89     | 0.9          | 0.73        | 0.53        | 0.89      | <b>0.92</b> |            |    |    |       |         |
| RSEM-EVAL score ( $\times 10^9$ )    |           | -1.72 | -1.68 | -2.61       | -1.7     | <b>-1.62</b> | -1.93       | -2.17       | -1.72     | -1.65       |            |    |    |       |         |
| <b>Transrate comparative metrics</b> |           |       |       |             |          |              |             |             |           |             |            |    |    |       |         |
| Contig score                         |           | 0.01  | 0.12  | 0.06        | 0.03     | 0.11         | 0.13        | <b>0.14</b> | 0.12      | 0.03        |            |    |    |       |         |
| P bases uncovered                    |           | 0.07  | 0.03  | <b>0.01</b> | 0.04     | <b>0.01</b>  | <b>0.01</b> | <b>0.01</b> | 0.02      | 0.06        |            |    |    |       |         |
| Contigs segmented                    |           | 566   | 894   | 780         | 1197     | 751          | 666         | <b>321</b>  | 810       | 1860        |            |    |    |       |         |
| P references with CRBB               |           | 0.12  | 0.19  | 0.19        | 0.13     | 0.19         | 0.16        | <b>0.21</b> | 0.16      | <b>0.21</b> |            |    |    |       |         |
| Reference coverage                   |           | 0.08  | 0.13  | 0.13        | 0.07     | 0.15         | 0.10        | <b>0.16</b> | 0.10      | 0.15        |            |    |    |       |         |
| 50% covered                          |           | 5092  | 7757  | 7745        | 4378     | 8140         | 5969        | <b>8692</b> | 5914      | 8619        |            |    |    |       |         |
| 95% covered                          |           | 3046  | 4593  | 4025        | 2474     | 5314         | 3200        | <b>5551</b> | 3518      | 5289        |            |    |    |       |         |

Table S3: Benchmarking of **BinPacker**, **Bridger**, **IDBA**-tran, **RNA-Bloom**, **rnaSPAdes**, **SOAP**denovo-Trans, **SPAdes**, **Trans-ABYSS** and **Trinity** on Human RNA-seq dataset. All contigs shorter than 200 bp were filtered out prior to the analysis. The annotated transcriptome of *H. sapiens* GRCh38.82 consists of 57820 genes and 196520 isoforms. The best values for each metric are highlighted with bold.

| Assembler                            | BinPacker    | Bridger | IDBA        | Bloom        | rnaSPAdes    | SOAP         | SPAdes      | ABYSS       | Trinity     |
|--------------------------------------|--------------|---------|-------------|--------------|--------------|--------------|-------------|-------------|-------------|
|                                      | Options      | 25      | 25          | 20-60        | 25           | 49, 73       | 23          | 21, 33, 55  | 32          |
| <b>rnaQUAST metrics</b>              |              |         |             |              |              |              |             |             |             |
| Transcripts                          | 144598       | 191459  | 173330      | 239912       | 167710       | 140769       | 223917      | 190798      | 234074      |
| Misassemblies                        | 9898         | 7487    | 1015        | 1643         | 2111         | <b>450</b>   | 3190        | 916         | 5183        |
| Duplication ratio                    | 2.03         | 1.61    | 1.02        | 2.75         | 1.36         | 1.12         | <b>1.01</b> | 1.25        | 2.00        |
| Database coverage, %                 | 17.2         | 16.6    | 19.6        | <b>24.8</b>  | 21.3         | 18.5         | 18.4        | 22.5        | 24.2        |
| 50%-assembled genes                  | 10763        | 10534   | 11712       | 12779        | <b>13377</b> | 12154        | 12395       | 12621       | 12902       |
| 95%-assembled genes                  | 4457         | 4226    | 1334        | 6121         | <b>7094</b>  | 5051         | 4427        | 4844        | 5398        |
| 50%-assembled isoforms               | 15133        | 14032   | 16260       | <b>22547</b> | 18619        | 15302        | 15533       | 19817       | 21876       |
| 95%-assembled isoforms               | 5080         | 4680    | 1338        | 7976         | <b>8026</b>  | 5259         | 4455        | 5046        | 6753        |
| <b>Detonate scores</b>               |              |         |             |              |              |              |             |             |             |
| Nucleotide precision                 | 0.28         | 0.32    | 0.43        | 0.21         | 0.35         | <b>0.43</b>  | 0.36        | 0.39        | 0.26        |
| Nucleotide recall                    | 0.84         | 0.83    | 0.73        | 0.88         | 0.84         | 0.72         | 0.76        | 0.78        | <b>0.89</b> |
| Nucleotide F1                        | 0.42         | 0.46    | <b>0.55</b> | 0.34         | 0.49         | 0.54         | 0.49        | 0.52        | 0.4         |
| Contig precision                     | 0.028        | 0.022   | 0.015       | 0.032        | 0.031        | <b>0.036</b> | 0.014       | 0.029       | 0.023       |
| Contig recall                        | 0.031        | 0.032   | 0.02        | <b>0.059</b> | 0.040        | 0.039        | 0.025       | 0.043       | 0.041       |
| Contig F1                            | 0.029        | 0.026   | 0.017       | <b>0.042</b> | 0.035        | 0.038        | 0.019       | 0.035       | 0.029       |
| <i>k</i> -mer recall                 | 0.86         | 0.86    | 0.63        | <b>0.91</b>  | 0.89         | 0.8          | 0.78        | 0.87        | 0.88        |
| KC score                             | 0.81         | 0.82    | 0.6         | 0.84         | <b>0.85</b>  | 0.78         | 0.74        | 0.83        | 0.82        |
| RSEM-EVAL score ( $\times 10^9$ )    | -3.23        | -3.18   | -6.76       | -3.12        | <b>-2.52</b> | -3.81        | -4.69       | -3.11       | -2.99       |
| <b>Transrate comparative metrics</b> |              |         |             |              |              |              |             |             |             |
| Contig score                         | 0.03         | 0.04    | 0.09        | 0.01         | <b>0.11</b>  | 0.09         | <b>0.11</b> | 0.10        | 0.03        |
| P bases uncovered                    | 0.52         | 0.35    | <b>0.05</b> | 0.58         | 0.21         | 0.12         | <b>0.05</b> | 0.19        | 0.48        |
| Contigs segmented                    | <b>14231</b> | 22648   | 19908       | 28072        | 16299        | 20240        | 16450       | 22428       | 27960       |
| P references with CRBB               | 0.19         | 0.18    | 0.21        | 0.23         | 0.18         | 0.14         | 0.16        | <b>0.24</b> | 0.23        |
| Reference coverage                   | 0.23         | 0.22    | 0.16        | <b>0.27</b>  | 0.22         | 0.16         | 0.17        | 0.22        | 0.26        |
| 50% covered                          | 16183        | 15231   | 13920       | <b>19997</b> | 15279        | 11826        | 13139       | 17036       | 19613       |
| 95% covered                          | 11800        | 10971   | 4043        | <b>14861</b> | 11376        | 7221         | 6704        | 10707       | 13042       |



Table S4: Benchmarking of **BinPacker**, **Bridger**, **IDBA**-tran, **RNA-Bloom**, **rnaSPAdes**, **SOAPdenovo-Trans**, **SPAdes**, **Trans-ABYSS** and **Trinity** on Human large RNA-seq dataset. All contigs shorter than 200 bp were filtered out prior to the analysis. The annotated transcriptome of *H. sapiens* GRCh38.82 consists of 57820 genes and 196520 isoforms. The best values for each metric are highlighted with bold.

| Assembler                            | BinPacker    | Bridger      | IDBA        | Bloom        | rnaSPAdes    | SOAP         | SPAdes      | ABYSS        | Trinity     |
|--------------------------------------|--------------|--------------|-------------|--------------|--------------|--------------|-------------|--------------|-------------|
| Options                              |              |              |             |              |              |              | --sc        |              |             |
| K                                    | 25           | 25           | 20-60       | 25           | 33, 49       | 23           | 21, 33, 55  | 32           | 25          |
| <b>rnaQUAST metrics</b>              |              |              |             |              |              |              |             |              |             |
| Transcripts                          | 157974       | 214502       | 206225      | 330948       | 225731       | 417161       | 226850      | 262474       | 280359      |
| Misassemblies                        | 8233         | 8048         | 825         | 9262         | 5023         | <b>275</b>   | 3003        | 1138         | 4766        |
| Duplication ratio                    | 1.66         | 1.57         | 1.02        | 4.22         | 1.50         | 1.12         | <b>1.01</b> | 1.41         | 2.23        |
| Database coverage, %                 | 16.5         | 17.3         | 20.4        | <b>26.5</b>  | 22.9         | 21.0         | 19.2        | 23.9         | 25.0        |
| 50%-assembled genes                  | 11345        | 11619        | 12898       | <b>14299</b> | 14524        | 13028        | 13415       | 13866        | 14178       |
| 95%-assembled genes                  | 4731         | 4769         | 1879        | <b>7481</b>  | 7373         | 4690         | 4614        | 5347         | 6301        |
| 50%-assembled isoforms               | 15150        | 15534        | 17928       | <b>27197</b> | 21157        | 22187        | 17484       | 22549        | 24669       |
| 95%-assembled isoforms               | 5278         | 5288         | 1889        | <b>10475</b> | 8695         | 4925         | 4664        | 5560         | 7924        |
| <b>Detonate scores</b>               |              |              |             |              |              |              |             |              |             |
| Nucleotide precision                 | 0.34         | 0.33         | <b>0.42</b> | 0.14         | 0.31         | 0.37         | 0.39        | 0.35         | 0.24        |
| Nucleotide recall                    | 0.78         | 0.80         | 0.73        | 0.87         | 0.85         | 0.72         | 0.75        | 0.75         | <b>0.86</b> |
| Nucleotide F1                        | 0.48         | 0.46         | <b>0.53</b> | 0.24         | 0.45         | 0.49         | 0.51        | 0.48         | 0.37        |
| Contig precision                     | <b>0.031</b> | 0.025        | 0.021       | 0.027        | 0.029        | 0.023        | 0.020       | 0.030        | 0.023       |
| Contig recall                        | 0.025        | 0.028        | 0.022       | 0.045        | 0.034        | <b>0.049</b> | 0.023       | 0.040        | 0.033       |
| Contig F1                            | 0.028        | 0.026        | 0.022       | <b>0.034</b> | 0.031        | 0.031        | 0.021       | <b>0.034</b> | 0.027       |
| <i>k</i> -mer recall                 | 0.87         | 0.87         | 0.53        | <b>0.94</b>  | 0.89         | 0.78         | 0.76        | 0.88         | 0.88        |
| KC score                             | 0.86         | 0.85         | 0.52        | <b>0.90</b>  | 0.88         | 0.76         | 0.75        | 0.86         | 0.86        |
| RSEM-EVAL score ( $\times 10^9$ )    | -7.89        | -7.87        | -19.41      | -7.59        | <b>-6.70</b> | -11.54       | -12.46      | -7.94        | -7.52       |
| <b>Transrate comparative metrics</b> |              |              |             |              |              |              |             |              |             |
| Contig score                         | 0.12         | 0.13         | 0.25        | 0.01         | 0.11         | 0.07         | <b>0.46</b> | 0.15         | 0.05        |
| P bases uncovered                    | 0.30         | 0.27         | <b>0.01</b> | 0.67         | 0.23         | 0.09         | <b>0.01</b> | 0.22         | 0.47        |
| Contigs segmented                    | 14885        | <b>19210</b> | 24031       | 35601        | 23591        | 32939        | 19951       | 30833        | 28469       |
| P references with CRBB               | 0.18         | 0.19         | 0.22        | 0.26         | 0.21         | 0.19         | 0.20        | <b>0.27</b>  | 0.25        |
| Reference coverage                   | 0.20         | 0.20         | 0.15        | <b>0.28</b>  | 0.21         | 0.15         | 0.16        | 0.21         | 0.24        |
| 50% covered                          | 15363        | 15433        | 13613       | <b>23311</b> | 17031        | 12349        | 13542       | 17972        | 20390       |
| 95% covered                          | 10778        | 10523        | 3861        | <b>16648</b> | 11396        | 5710         | 5737        | 10605        | 12723       |

Table S5: Benchmarking of **BinPacker**, **Bridger**, **IDBA**-tran, **RNA-Bloom**, **rnaSPAdes**, **SOAPdenovo-Trans**, **SPAdes**, **Trans-ABYSS** and **Trinity** on Mouse RNA-seq dataset. The annotated transcriptome of *M. musculus* GRCh38.75 consists of 38924 genes and 94545 isoforms. All contigs shorter than 200 bp were filtered out prior to the analysis. The best values for each metric are highlighted with bold.

| Assembler                            | BinPacker  |             | Bridger     |             | IDBA         | Bloom       | rnaSPAdes   | SOAP         | SPAdes       |      |    | ABYSS | Trinity |
|--------------------------------------|------------|-------------|-------------|-------------|--------------|-------------|-------------|--------------|--------------|------|----|-------|---------|
|                                      | 25         | 25          | 25          | 20-60       | 25           | 25          | 33, 49      | 23           | 21, 33, 55   | --sc | 32 | 32    | 25      |
| <b>rnaQUAST metrics</b>              |            |             |             |             |              |             |             |              |              |      |    |       |         |
| Transcripts                          | 27234      | 42029       | 38313       | 46440       | 41975        | 31878       | 42949       | 36488        | 47746        |      |    |       |         |
| Misassemblies                        | 947        | 923         | 387         | 732         | 306          | <b>37</b>   | 497         | 194          | 459          |      |    |       |         |
| Duplication ratio                    | 1.12       | 1.09        | <b>1.00</b> | 1.33        | 1.03         | <b>1.00</b> | <b>1.00</b> | 1.09         | 1.15         |      |    |       |         |
| Database coverage, %                 | 14.4       | 16.3        | 16.9        | 13.8        | 17.8         | 15.1        | 17.7        | 16.2         | <b>18.2</b>  |      |    |       |         |
| 50%-assembled genes                  | 6005       | 6090        | 6558        | 4859        | <b>7001</b>  | 6241        | 6890        | 6321         | 6633         |      |    |       |         |
| 95%-assembled genes                  | 1917       | 1909        | 1602        | 1256        | <b>2494</b>  | 1653        | 2450        | 1798         | 2272         |      |    |       |         |
| 50%-assembled isoforms               | 6360       | 6451        | 6790        | 5591        | 7309         | 6376        | 7053        | 6931         | <b>7386</b>  |      |    |       |         |
| 95%-assembled isoforms               | 1992       | 1982        | 1602        | 1346        | <b>2536</b>  | 1655        | 2450        | 1850         | 2406         |      |    |       |         |
| <b>Detonate scores</b>               |            |             |             |             |              |             |             |              |              |      |    |       |         |
| Nucleotide precision                 | 0.76       | 0.76        | 0.86        | 0.59        | 0.80         | <b>0.89</b> | 0.82        | 0.79         | 0.7          |      |    |       |         |
| Nucleotide recall                    | 0.69       | 0.77        | 0.75        | 0.59        | 0.78         | 0.68        | <b>0.79</b> | 0.71         | <b>0.79</b>  |      |    |       |         |
| Nucleotide F1                        | 0.73       | 0.76        | 0.8         | 0.59        | 0.79         | 0.77        | <b>0.81</b> | 0.75         | 0.74         |      |    |       |         |
| Contig precision                     | 0.204      | 0.163       | 0.174       | 0.1         | 0.188        | 0.22        | 0.164       | <b>0.218</b> | 0.159        |      |    |       |         |
| Contig recall                        | 0.052      | 0.064       | 0.062       | 0.043       | 0.074        | 0.066       | 0.066       | <b>0.075</b> | 0.071        |      |    |       |         |
| Contig F1                            | 0.083      | 0.092       | 0.092       | 0.06        | 0.106        | 0.101       | 0.094       | <b>0.111</b> | 0.098        |      |    |       |         |
| <i>k</i> -mer recall                 | 0.88       | 0.89        | 0.34        | <b>0.92</b> | 0.89         | 0.67        | 0.6         | 0.88         | 0.79         |      |    |       |         |
| KC score                             | 0.85       | 0.85        | 0.31        | <b>0.89</b> | 0.86         | 0.65        | 0.57        | 0.85         | 0.75         |      |    |       |         |
| RSEM-EVAL score ( $\times 10^9$ )    | -1.02      | -1.02       | -2.31       | -1.1        | <b>-0.93</b> | -1.46       | -1.7        | -1.03        | -1.08        |      |    |       |         |
| <b>Transrate comparative metrics</b> |            |             |             |             |              |             |             |              |              |      |    |       |         |
| Contig score                         | 0.23       | 0.25        | 0.19        | 0.05        | 0.20         | 0.37        | <b>0.41</b> | 0.38         | 0.14         |      |    |       |         |
| P bases uncovered                    | 0.18       | 0.14        | <b>0.01</b> | 0.33        | 0.06         | 0.02        | <b>0.01</b> | 0.13         | 0.21         |      |    |       |         |
| Contigs segmented                    | <b>904</b> | 1319        | 1383        | 3257        | 1366         | 1099        | 991         | 1798         | 1961         |      |    |       |         |
| P references with CRBB               | 0.18       | 0.21        | 0.21        | 0.21        | 0.21         | 0.19        | 0.21        | 0.21         | <b>0.22</b>  |      |    |       |         |
| Reference coverage                   | 0.17       | <b>0.18</b> | 0.17        | 0.14        | <b>0.18</b>  | 0.15        | <b>0.18</b> | 0.17         | <b>0.18</b>  |      |    |       |         |
| 50% covered                          | 9125       | 9606        | 9331        | 7988        | 9630         | 8377        | 9537        | 9310         | <b>10112</b> |      |    |       |         |
| 95% covered                          | 6292       | 6344        | 5511        | 4756        | 6608         | 5063        | 6414        | 6115         | <b>6710</b>  |      |    |       |         |

Table S6: Benchmarking of **BinPacker**, **Bridger**, **IDBA**-tran, **RNA-Bloom**, **rnaSPAdes**, **SOAP**denovo-Trans, **SPAdes**, **Trans-ABYSS** and **Trinity** on Worm RNA-seq dataset. The annotated transcriptome of *C. elegans* WBcel235.82 consists of 46748 genes and 57834 isoforms. All contigs shorter than 200 bp were filtered out prior to the analysis. The best values for each metric are highlighted with bold.

| Assembler                            | BinPacker |       | Bridger     | IDBA         |              | Bloom        | rnaSPAdes   |             | SOAP         | SPAdes     |      |            | ABYSS | Trinity |
|--------------------------------------|-----------|-------|-------------|--------------|--------------|--------------|-------------|-------------|--------------|------------|------|------------|-------|---------|
|                                      | 25        | 25    |             | 20-60        | 25           |              | 29, 45      | 23          |              | 21, 33, 55 | --sc | 21, 33, 55 |       |         |
| <b>rnaQUAST metrics</b>              |           |       |             |              |              |              |             |             |              |            |      |            |       |         |
| Transcripts                          | 20460     | 22147 | 23172       | 29995        | 23654        | 18801        | 21235       | 46145       | 24428        |            |      |            |       |         |
| Misassemblies                        | 294       | 256   | 40          | 96           | 105          | <b>28</b>    | 130         | 37          | 217          |            |      |            |       |         |
| Duplication ratio                    | 1.20      | 1.14  | 1.01        | 1.59         | 1.11         | 1.01         | <b>1.00</b> | 1.68        | 1.17         |            |      |            |       |         |
| Database coverage, %                 | 33.3      | 33.7  | 33.2        | <b>37.9</b>  | 36.0         | 32.1         | 33.3        | 37.7        | 36.1         |            |      |            |       |         |
| 50%-assembled genes                  | 9907      | 9950  | 10075       | 10028        | <b>10650</b> | 9867         | 10378       | 10130       | 10394        |            |      |            |       |         |
| 95%-assembled genes                  | 5666      | 5654  | 3786        | 5390         | <b>6306</b>  | 5155         | 5948        | 5413        | 5682         |            |      |            |       |         |
| 50%-assembled isoforms               | 10398     | 10352 | 10227       | <b>11639</b> | 11197        | 9995         | 10426       | 11058       | 11127        |            |      |            |       |         |
| 95%-assembled isoforms               | 5910      | 5874  | 3788        | 6100         | <b>6541</b>  | 5198         | 5949        | 5487        | 6030         |            |      |            |       |         |
| <b>Detonate scores</b>               |           |       |             |              |              |              |             |             |              |            |      |            |       |         |
| Nucleotide precision                 | 0.69      | 0.72  | 0.86        | 0.48         | 0.72         | <b>0.87</b>  | 0.84        | 0.47        | 0.68         |            |      |            |       |         |
| Nucleotide recall                    | 0.86      | 0.88  | 0.85        | 0.86         | <b>0.89</b>  | 0.84         | 0.87        | 0.87        | 0.88         |            |      |            |       |         |
| Nucleotide F1                        | 0.77      | 0.79  | <b>0.86</b> | 0.62         | 0.80         | 0.85         | <b>0.86</b> | 0.61        | 0.77         |            |      |            |       |         |
| Contig precision                     | 0.289     | 0.269 | 0.205       | 0.248        | 0.258        | <b>0.331</b> | 0.27        | 0.148       | 0.284        |            |      |            |       |         |
| Contig recall                        | 0.151     | 0.152 | 0.121       | 0.19         | 0.156        | 0.159        | 0.146       | 0.175       | <b>0.177</b> |            |      |            |       |         |
| Contig F1                            | 0.198     | 0.195 | 0.153       | 0.215        | 0.195        | 0.215        | 0.19        | 0.161       | <b>0.218</b> |            |      |            |       |         |
| <i>k</i> -mer recall                 | 0.96      | 0.96  | 0.67        | <b>0.99</b>  | 0.97         | 0.91         | 0.96        | 0.96        | 0.96         |            |      |            |       |         |
| KC score                             | 0.95      | 0.95  | 0.67        | <b>0.98</b>  | 0.96         | 0.9          | 0.96        | 0.96        | 0.95         |            |      |            |       |         |
| RSEM-EVAL score ( $\times 10^9$ )    | -1.56     | -1.56 | -5.24       | <b>-1.31</b> | -1.41        | -2.34        | -1.62       | -1.49       | -1.44        |            |      |            |       |         |
| <b>Transrate comparative metrics</b> |           |       |             |              |              |              |             |             |              |            |      |            |       |         |
| Contig score                         | 0.26      | 0.34  | 0.34        | 0.06         | 0.37         | 0.50         | <b>0.61</b> | 0.05        | 0.29         |            |      |            |       |         |
| P bases uncovered                    | 0.26      | 0.19  | <b>0.00</b> | 0.51         | 0.15         | 0.02         | <b>0.00</b> | 0.51        | 0.25         |            |      |            |       |         |
| Contigs segmented                    | 3067      | 3301  | 4215        | 4497         | 3640         | <b>2886</b>  | 2978        | 5035        | 3875         |            |      |            |       |         |
| P references with CRBB               | 0.39      | 0.41  | 0.41        | <b>0.44</b>  | 0.43         | 0.39         | 0.41        | <b>0.44</b> | 0.43         |            |      |            |       |         |
| Reference coverage                   | 0.34      | 0.35  | 0.32        | <b>0.38</b>  | 0.35         | 0.30         | 0.33        | 0.36        | 0.36         |            |      |            |       |         |
| 50% covered                          | 10822     | 10908 | 10643       | <b>11638</b> | 11391        | 9937         | 10668       | 11270       | 11446        |            |      |            |       |         |
| 95% covered                          | 8615      | 8589  | 6480        | <b>9084</b>  | 8885         | 7004         | 8015        | 8355        | 9039         |            |      |            |       |         |

Table S7: Benchmarking of **BinPacker**, **IDBA**-tran, **RNA-Bloom**, **rnaSPAdes**, **SOAPdenovo-Trans**, **SPAdes**, **Trans-ABYSS** and **Trinity** on Corn SS dataset. Assemblers having strand-specific mode were run with the corresponding options. The annotated transcriptome of *Z. mays* AGPv3.29 consists of 39479 genes and 63230 isoforms. All contigs shorter than 200 bp were filtered out prior to the analysis. The best values for each metric are highlighted with bold. *Note, that Bridger failed to assemble this dataset.*

| Assembler                                       | BinPacker    | IDBA         | Bloom        | rnaSPAdes    | SOAP   | SPAdes       | ABYSS        | Trinity     |
|-------------------------------------------------|--------------|--------------|--------------|--------------|--------|--------------|--------------|-------------|
| Options                                         |              |              |              |              |        | --sc         |              |             |
| K                                               | 25           | 20-60        | 25           | 33, 49       | 23     | 21, 33, 55   | 32           | 25          |
| <b>rnaQUAST metrics in normal mode</b>          |              |              |              |              |        |              |              |             |
| Transcripts                                     | 20981        | 123286       | 152794       | 99255        | 191089 | 96929        | 139985       | 150288      |
| Misassemblies                                   | 3833         | <b>303</b>   | 4313         | 2534         | 430    | 1481         | 794          | 3301        |
| Duplication ratio                               | 1.92         | 1.06         | 2.94         | 1.49         | 1.07   | <b>1.04</b>  | 1.48         | 2.08        |
| Database coverage, %                            | 11.7         | 32.2         | <b>38.7</b>  | 35.6         | 30.3   | 31           | 35.2         | 37.3        |
| 50%-assembled genes                             | 5397         | 9005         | 14644        | <b>15374</b> | 10322  | 12946        | 12918        | 14605       |
| 95%-assembled genes                             | 2204         | 840          | 4617         | <b>4999</b>  | 2456   | 3150         | 3306         | 4457        |
| 50%-assembled isoforms                          | 6106         | 9431         | <b>19412</b> | 17789        | 10726  | 13356        | 14630        | 18139       |
| 95%-assembled isoforms                          | 2394         | 840          | <b>5460</b>  | 5377         | 2489   | 3161         | 3405         | 4998        |
| <b>rnaQUAST metrics in strand-specific mode</b> |              |              |              |              |        |              |              |             |
| DATABASE COVERAGE, %                            | 11.7         | 16.4         | <b>38.2</b>  | 35.1         | 15.4   | 15.9         | 34.7         | 36.8        |
| 50%-assembled genes                             | 5368         | 4603         | 14457        | <b>15128</b> | 5220   | 6687         | 12701        | 14373       |
| 95%-assembled genes                             | 2189         | 454          | 4543         | <b>4915</b>  | 1260   | 1612         | 3246         | 4381        |
| 50%-assembled isoforms                          | 6077         | 4713         | <b>19201</b> | 17542        | 5376   | 6801         | 14401        | 17890       |
| 95%-assembled isoforms                          | 2379         | 454          | <b>5384</b>  | 5290         | 1273   | 1615         | 3343         | 4921        |
| <b>Detonate scores</b>                          |              |              |              |              |        |              |              |             |
| Nucleotide precision                            | 0.32         | <b>0.40</b>  | 0.15         | 0.29         | 0.39   | <b>0.40</b>  | 0.32         | 0.23        |
| Nucleotide recall                               | 0.44         | 0.77         | 0.87         | 0.87         | 0.72   | 0.80         | 0.82         | <b>0.88</b> |
| Nucleotide F1                                   | 0.37         | 0.53         | 0.26         | 0.44         | 0.51   | <b>0.53</b>  | 0.46         | 0.36        |
| Contig precision                                | <b>0.087</b> | 0.026        | 0.053        | 0.043        | 0.027  | 0.027        | 0.048        | 0.046       |
| Contig recall                                   | 0.020        | 0.034        | <b>0.088</b> | 0.046        | 0.056  | 0.029        | 0.072        | 0.074       |
| Contig F1                                       | 0.032        | 0.029        | <b>0.066</b> | 0.044        | 0.036  | 0.028        | 0.057        | 0.056       |
| <i>k</i> -mer recall                            | 0.61         | 0.55         | <b>0.78</b>  | 0.71         | 0.51   | 0.66         | 0.69         | 0.70        |
| KC score                                        | 0.59         | 0.53         | <b>0.72</b>  | 0.68         | 0.49   | 0.64         | 0.67         | 0.66        |
| RSEM-EVAL score ( $\times 10^9$ )               | -2.80        | -5.72        | <b>-1.64</b> | -1.86        | -4.91  | -2.86        | -2.22        | -1.96       |
| <b>Transrate comparative metrics</b>            |              |              |              |              |        |              |              |             |
| Contig score                                    | 0.027        | 0.196        | 0.015        | 0.142        | 0.036  | <b>0.388</b> | 0.109        | 0.061       |
| P bases uncovered                               | 0.479        | <b>0.015</b> | 0.637        | 0.291        | 0.097  | 0.019        | 0.222        | 0.481       |
| Contigs segmented                               | <b>3870</b>  | 13678        | 13865        | 9431         | 16305  | 7347         | 14029        | 10701       |
| P references with CRBB                          | 0.076        | 0.247        | 0.273        | 0.222        | 0.220  | 0.213        | <b>0.284</b> | 0.264       |
| Reference coverage                              | 0.066        | 0.104        | <b>0.198</b> | 0.149        | 0.088  | 0.107        | 0.144        | 0.174       |
| 50% covered                                     | 8531         | 17537        | <b>27336</b> | 21258        | 12476  | 16768        | 21278        | 24849       |
| 95% covered                                     | 5844         | 4361         | <b>14672</b> | 11504        | 4709   | 6547         | 9848         | 12921       |

Table S8: Benchmarking of **BinPacker**, **Bridger**, **IDBA**-tran, **RNA-Bloom**, **rnaSPAdes**, **SOAP**denovo-Trans, **SPAdes**, **Trans-ABYSS** and **Trinity** on Arabidopsis SS dataset. Assemblers having strand-specific mode were run with the corresponding options. The annotated transcriptome of *A. thaliana* TAIR10.29 consists of 31496 genes and 40646 isoforms. All contigs shorter than 200 bp were filtered out prior to the analysis. The best values for each metric are highlighted with bold.

| Assembler                                       | BinPacker | Bridger | IDBA        | Bloom        | rnaSPAdes    | SOAP       | SPAdes       | ABYSS  | Trinity     |
|-------------------------------------------------|-----------|---------|-------------|--------------|--------------|------------|--------------|--------|-------------|
| Options                                         |           |         |             |              |              |            | --sc         |        |             |
| K                                               | 25        | 25      | 20-60       | 25           | 43, 63       | 23         | 21, 33, 55   | 32     | 25          |
| <b>rnaQUAST metrics in normal mode</b>          |           |         |             |              |              |            |              |        |             |
| Transcripts                                     | 82756     | 89058   | 72148       | 148393       | 61951        | 151437     | 63846        | 114944 | 118184      |
| Misassemblies                                   | 5490      | 5368    | 205         | 2078         | 567          | <b>182</b> | 632          | 418    | 2296        |
| Duplication ratio                               | 1.82      | 1.72    | <b>1.05</b> | 4.00         | 1.74         | 1.14       | <b>1.05</b>  | 1.53   | 2.62        |
| Database coverage, %                            | 49.8      | 50.5    | 51.8        | <b>63.8</b>  | 57           | 52.2       | 51.1         | 56.8   | 61          |
| 50%-assembled genes                             | 16871     | 16928   | 16454       | <b>20606</b> | 20187        | 17450      | 17633        | 19140  | 20439       |
| 95%-assembled genes                             | 12242     | 12211   | 4455        | <b>16783</b> | 16217        | 8925       | 11267        | 10891  | 15580       |
| 50%-assembled isoforms                          | 17969     | 18019   | 16490       | <b>24061</b> | 21687        | 17687      | 17670        | 19532  | 22901       |
| 95%-assembled isoforms                          | 12876     | 12795   | 4455        | <b>18700</b> | 16959        | 8983       | 11268        | 10898  | 16763       |
| <b>rnaQUAST metrics in strand-specific mode</b> |           |         |             |              |              |            |              |        |             |
| Database coverage, %                            | 45.4      | 45.7    | 26.6        | <b>62.1</b>  | 56           | 27.4       | 29           | 54.2   | 60          |
| 50%-assembled genes                             | 16460     | 16507   | 8523        | <b>20473</b> | 19894        | 9244       | 9936         | 18924  | 20281       |
| 95%-assembled genes                             | 12208     | 12175   | 2360        | <b>16774</b> | 16103        | 4858       | 6347         | 10846  | 15556       |
| 50%-assembled isoforms                          | 17391     | 17427   | 8526        | <b>23832</b> | 21400        | 9369       | 9950         | 19161  | 22718       |
| 95%-assembled isoforms                          | 12844     | 12761   | 2360        | <b>18694</b> | 16855        | 4888       | 6348         | 10852  | 16743       |
| <b>Detonate scores</b>                          |           |         |             |              |              |            |              |        |             |
| Nucleotide precision                            | 0.37      | 0.37    | <b>0.67</b> | 0.17         | 0.41         | 0.53       | 0.64         | 0.47   | 0.26        |
| Nucleotide recall                               | 0.94      | 0.95    | 0.88        | <b>0.97</b>  | 0.96         | 0.88       | 0.91         | 0.92   | <b>0.97</b> |
| Nucleotide F1                                   | 0.53      | 0.54    | <b>0.76</b> | 0.29         | 0.58         | 0.66       | 0.75         | 0.62   | 0.41        |
| Contig precision                                | 0.07      | 0.06    | 0.03        | 0.07         | <b>0.11</b>  | 0.04       | 0.05         | 0.07   | 0.07        |
| Contig recall                                   | 0.13      | 0.13    | 0.06        | <b>0.26</b>  | 0.16         | 0.16       | 0.08         | 0.20   | 0.20        |
| Contig F1                                       | 0.087     | 0.082   | 0.041       | 0.114        | <b>0.132</b> | 0.070      | 0.063        | 0.107  | 0.104       |
| <i>k</i> -mer recall                            | 0.92      | 0.92    | 0.58        | <b>0.99</b>  | 0.94         | 0.73       | 0.82         | 0.92   | 0.92        |
| KC score                                        | 0.92      | 0.92    | 0.58        | <b>0.98</b>  | 0.94         | 0.72       | 0.81         | 0.92   | 0.91        |
| RSEM-EVAL score ( $\times 10^9$ )               | -12.19    | -12.20  | -30.31      | <b>-9.77</b> | -11.05       | -20.56     | -18.90       | -12.81 | -12.39      |
| <b>Transrate comparative metrics</b>            |           |         |             |              |              |            |              |        |             |
| Contig score                                    | 0.030     | 0.029   | 0.062       | 0.004        | 0.063        | 0.023      | <b>0.126</b> | 0.045  | 0.017       |
| P bases uncovered                               | 0.28      | 0.25    | 0.03        | 0.60         | 0.20         | 0.10       | <b>0.03</b>  | 0.14   | 0.48        |
| Contigs segmented                               | 17238     | 18195   | 21694       | 20102        | <b>14615</b> | 17124      | 14733        | 22702  | 20610       |
| P references with CRBB                          | 0.51      | 0.52    | 0.48        | <b>0.58</b>  | 0.50         | 0.46       | 0.47         | 0.56   | 0.57        |
| Reference coverage                              | 0.45      | 0.45    | 0.36        | <b>0.54</b>  | 0.46         | 0.33       | 0.37         | 0.44   | 0.51        |
| 50% covered                                     | 21423     | 21356   | 18333       | <b>25458</b> | 21925        | 16606      | 18305        | 21120  | 24321       |
| 95% covered                                     | 17723     | 17387   | 8992        | <b>22247</b> | 18765        | 9381       | 12150        | 16235  | 20380       |

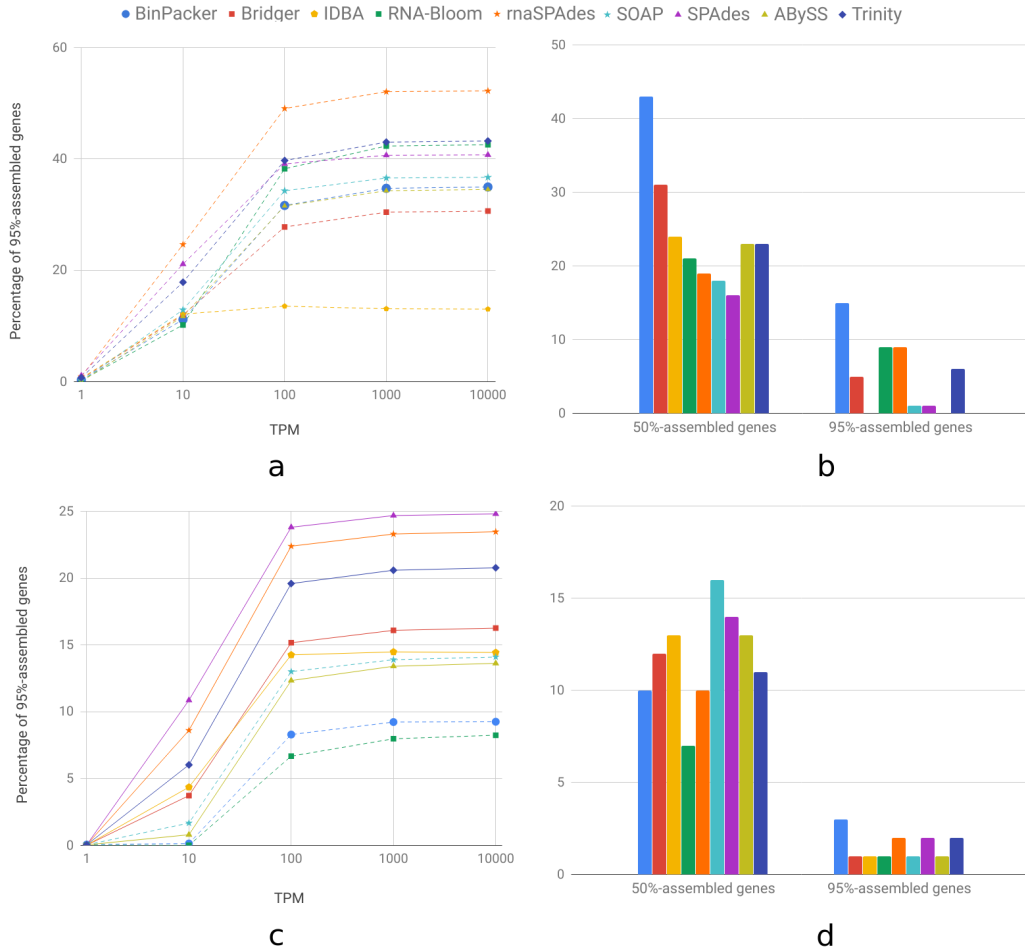

Figure S1: (a, c) Cumulative plot showing how fraction of 95%-assembled genes in each assembly depends on the gene coverage by reads in TPM (Transcripts Per Kilobase Million) reported by RSEM simulator; (b, d) Number of 50%/95%-assembled genes in each assembly that have zero reads generated by RSEM simulator (i.e. falsely assembled genes). Plots (a, b) are constructed for assemblies obtained from Human simulated data, (c, d) represent Mouse simulated dataset.

■ Missing ■ Fragmented ■ Complete and duplicated ■ Complete and single-copy

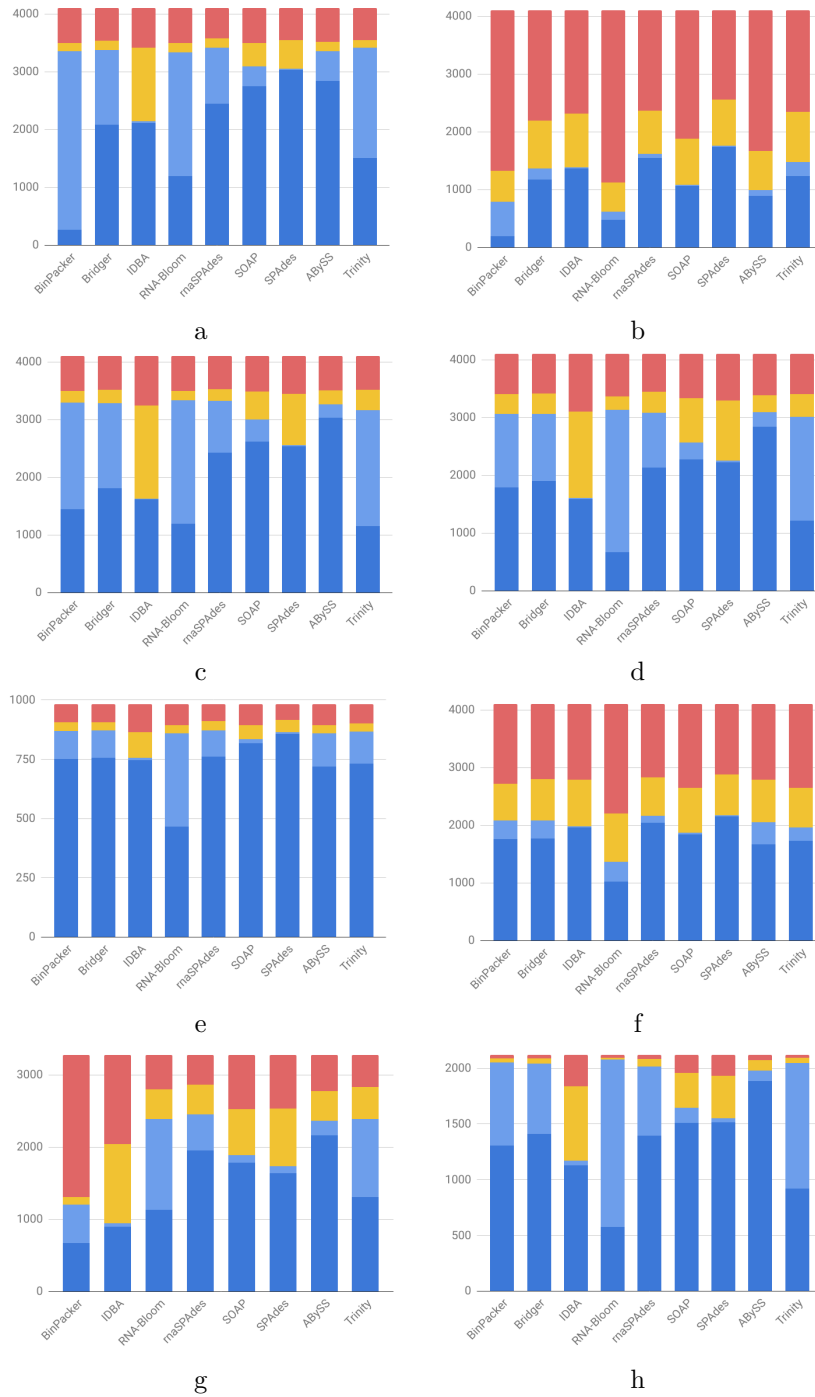

Figure S2: BUSCO results for (a) Human simulated, (b) Mouse simulated, (c) Human, (d) Human large, (e) Mouse, (f) Worm, (g) Corn SS and (h) Arabidopsis SS assemblies. Dark blue indicates complete and single-copy genes, light blue — complete and duplicated, yellow — fragmented and red corresponds to missing BUSCOs. The following BUSCO gene databases were used for the analysis: mammalian for all *H. sapiens* and *M. musculus* assemblies, nematoda for *C. elegans*, liliopsida for *Z. mays* and eudicotyledons for *A. thaliana*.

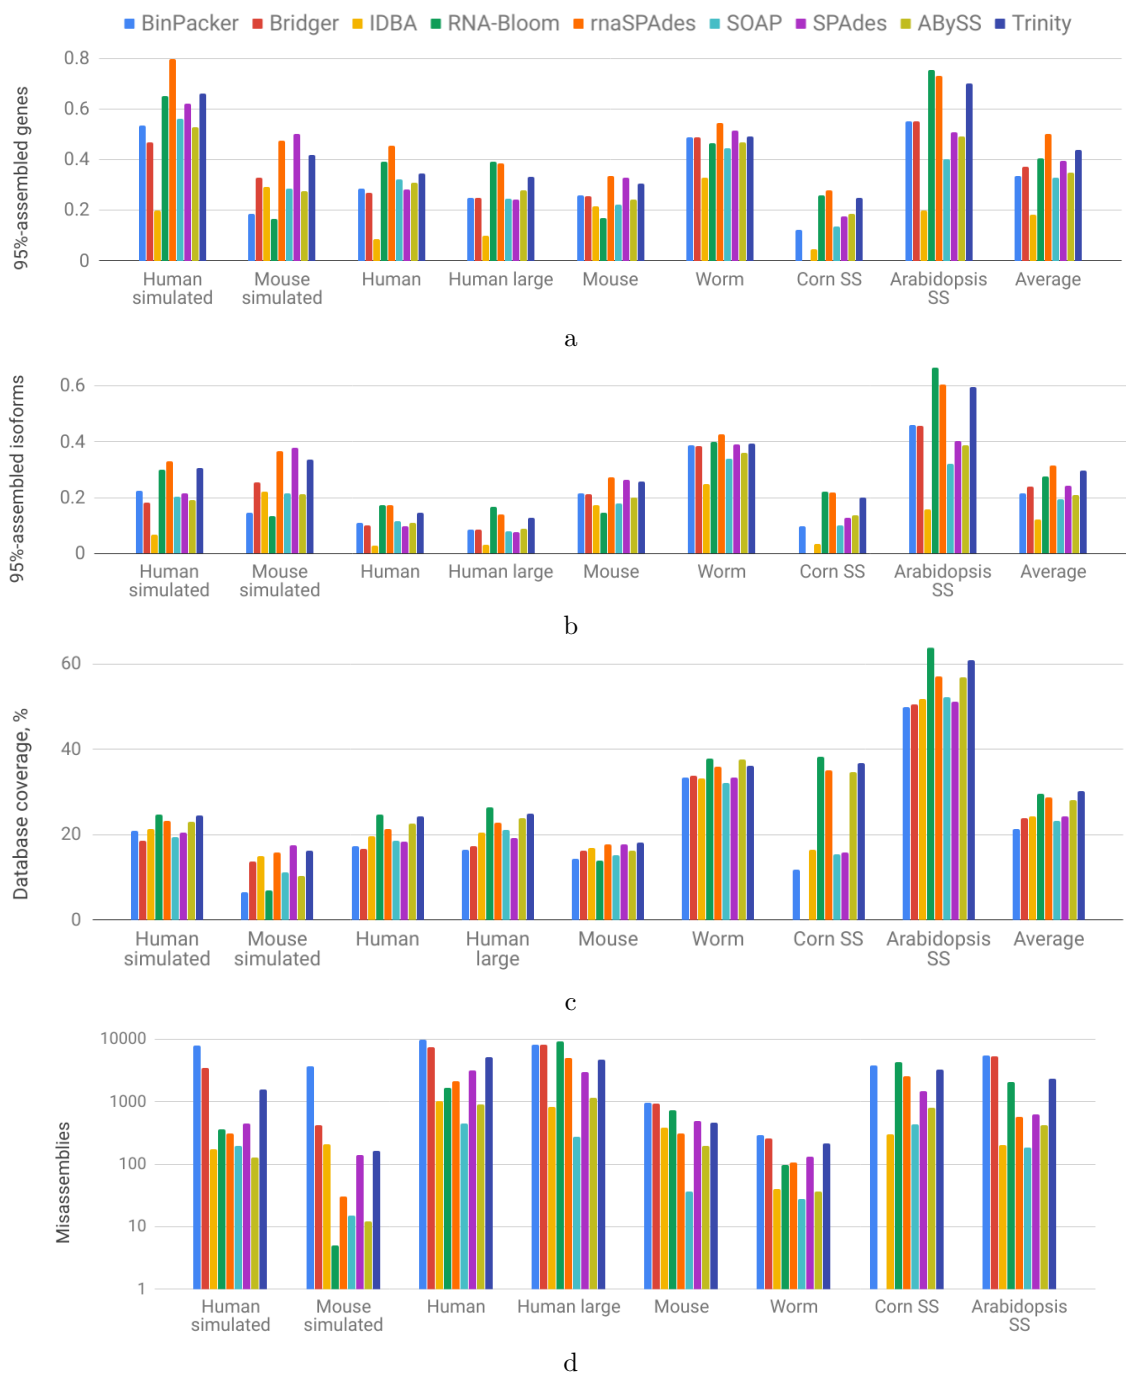

Figure S3: (a) Fraction of 95%-assembled genes, (b) fraction of 95%-assembled isoforms, (c) database coverage and (d) misassemblies reported by rnaQUAST drawn as bar plots for all generated assemblies. Fraction of assembled genes/isoforms is calculated relative to number of genes/isoforms reported by kallisto (Bray *et al.*, 2016) with per-nucleotide coverage > 5 (see Table S15 for details). Plot for number of misassemblies is given in logarithmic scale. The last columns show average values over all datasets (except for misassemblies).



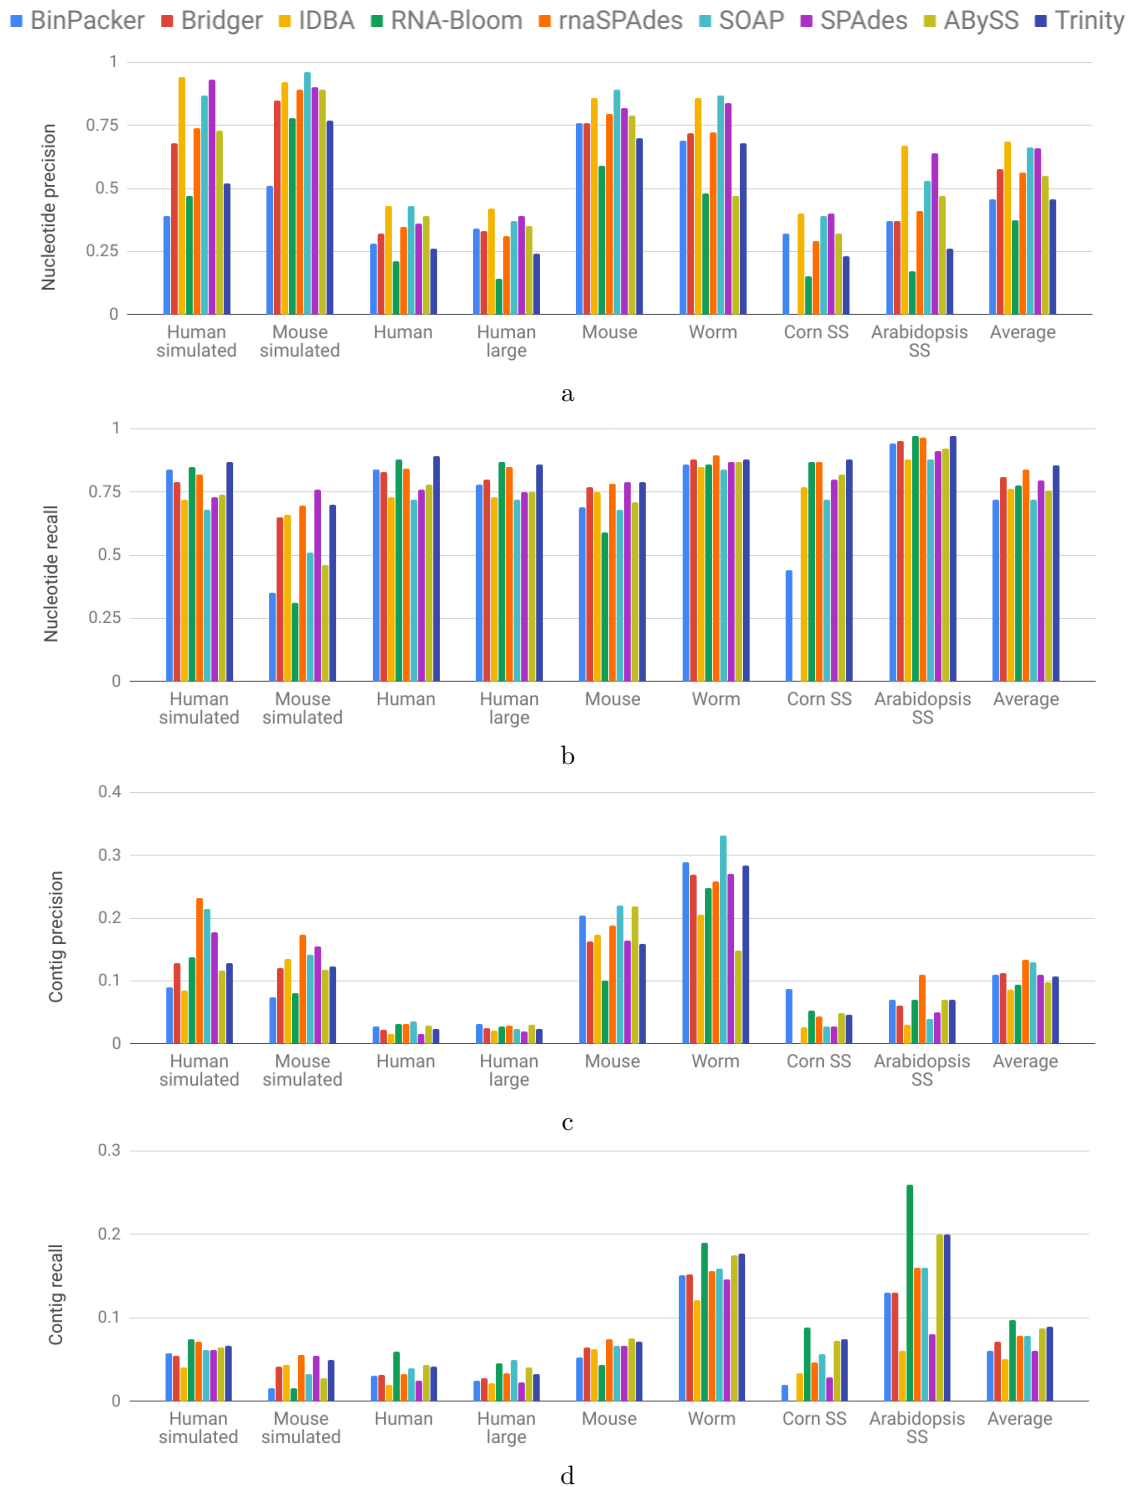

Figure S4: (a) Nucleotide precision, (b) nucleotide recall, (c) contig precision, and (d) contig recall reported by DETONATE REF-EVAL drawn as bar plots for all generated assemblies. The last columns show average values over all datasets.

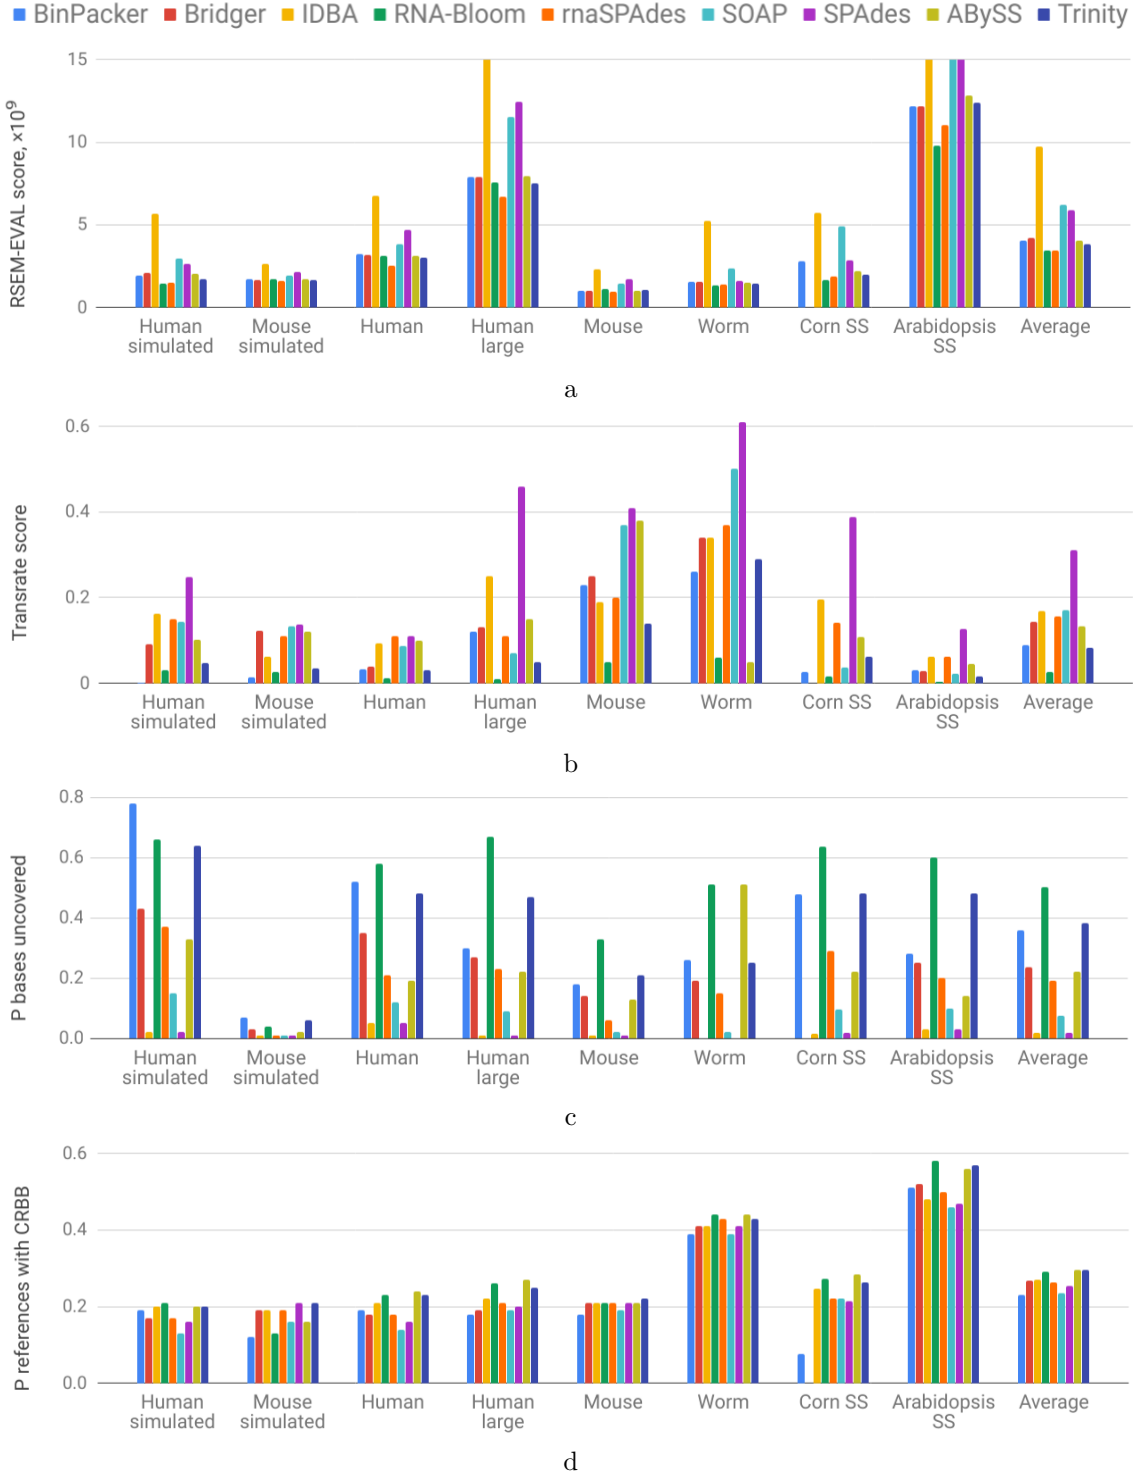

Figure S5: (a) Detonate RSEM-EVAL score, (b) Transrate score, (c) fraction of uncovered bases and (d) fraction of reference sequences covered by CBBR hits reported by Transrate drawn as bar plots for all generated assemblies. The last columns show average values over all datasets. For better visibility, the absolute value of original RSEM-EVAL score was taken, thus, the lower the value, the better the assembly according to this metric. Note, that some bars were cut to the maximal Y axis value.

Table S9: maSPAdes performance with different  $k$ -mer sizes on Worm dataset (90 bp long paired-end reads). Upper part of the table contains results for single- $k$  runs. Lower part shows maSPAdes performance for different lower  $k$  values with fixed upper one (45). Default  $k$ -mer sizes and the best values for each metric are highlighted with bold. *Note, that these experiments were performed during maSPAdes development and thus results may not be exactly the same as in comparison tables.*

| <b>Single k-mer size</b>                            |  | 21    | 25    | 29           | 33          | 37           | 41        | <b>45</b> | 49    | 53    | 57        | 61    | 65    | 69    |
|-----------------------------------------------------|--|-------|-------|--------------|-------------|--------------|-----------|-----------|-------|-------|-----------|-------|-------|-------|
| K value                                             |  |       |       |              |             |              |           |           |       |       |           |       |       |       |
| Transcripts                                         |  | 32626 | 33207 | 33133        | 33402       | 33598        | 33728     | 34015     | 34594 | 35567 | 36850     | 38803 | 41401 | 45218 |
| Misassemblies                                       |  | 572   | 233   | 180          | 146         | 114          | 88        | 86        | 84    | 72    | <b>54</b> | 63    | 79    | 77    |
| Database coverage, %                                |  | 35    | 36.6  | 36.7         | <b>37</b>   | <b>37</b>    | 36.8      | 36.7      | 36.5  | 36.4  | 36        | 35.8  | 35.6  | 35.4  |
| 50%-assembled genes                                 |  | 10142 | 10664 | 10752        | 10821       | <b>10854</b> | 10833     | 10778     | 10752 | 10713 | 10637     | 10537 | 10422 | 10218 |
| 95%-assembled genes                                 |  | 5627  | 6260  | 6354         | <b>6406</b> | 6403         | 6389      | 6338      | 6194  | 6062  | 5880      | 5765  | 5601  | 5405  |
| <b>Iterative run with fixed upper k-mer size 45</b> |  |       |       |              |             |              |           |           |       |       |           |       |       |       |
| Lower k-mer size                                    |  | 21    | 25    | <b>29</b>    | 33          | 37           | 41        |           |       |       |           |       |       |       |
| Transcripts                                         |  | 32936 | 33190 | 33259        | 33461       | 33583        | 33755     |           |       |       |           |       |       |       |
| Misassemblies                                       |  | 177   | 108   | 94           | 102         | 100          | <b>93</b> |           |       |       |           |       |       |       |
| Database coverage, %                                |  | 36.5  | 36.8  | 36.8         | <b>36.9</b> | 36.8         | 36.8      |           |       |       |           |       |       |       |
| 50%-assembled genes                                 |  | 10792 | 10870 | <b>10887</b> | 10884       | 10855        | 10832     |           |       |       |           |       |       |       |
| 95%-assembled genes                                 |  | 6382  | 6441  | <b>6446</b>  | 6438        | 6405         | 6388      |           |       |       |           |       |       |       |

Table S10: maSPAdes performance with different  $k$ -mer sizes on Mouse dataset (101 bp long paired-end reads). Upper part of the table contains results for single- $k$  runs. Lower part shows maSPAdes performance for different lower  $k$  values with fixed upper one (49). Default  $k$ -mer sizes and the best values for each metric are highlighted with bold. *Note, that these experiments were performed during maSPAdes development and thus results may not be exactly the same as in comparison tables.*

| <b>Single k-mer size</b> |  | 21                                                  | 25          | 29          | 33          | 37    | 41    | 45         | 49         | 53    | 57    | 61    | 65    | 69     |  |
|--------------------------|--|-----------------------------------------------------|-------------|-------------|-------------|-------|-------|------------|------------|-------|-------|-------|-------|--------|--|
| K value                  |  | 62702                                               | 68785       | 71583       | 72341       | 73263 | 74624 | 76692      | 78965      | 81989 | 86209 | 92204 | 99998 | 110489 |  |
| Transcripts              |  | 1443                                                | 634         | 397         | 328         | 249   | 220   | 205        | <b>173</b> | 220   | 247   | 362   | 516   | 664    |  |
| Misassemblies            |  | 17.4                                                | 19.1        | 19.6        | <b>19.7</b> | 19.6  | 19.6  | 19.5       | 19.4       | 19.3  | 19.1  | 18.9  | 18.6  | 18.3   |  |
| Database coverage, %     |  | 6301                                                | 6904        | 7023        | <b>7068</b> | 7029  | 6968  | 6890       | 6737       | 6568  | 6334  | 6029  | 5634  | 5180   |  |
| 50%-assembled genes      |  | 1808                                                | 2324        | 2495        | <b>2517</b> | 2496  | 2477  | 2383       | 2309       | 2200  | 2071  | 1941  | 1708  | 1507   |  |
| 95%-assembled genes      |  | <b>Iterative run with fixed upper k-mer size 49</b> |             |             |             |       |       |            |            |       |       |       |       |        |  |
| Lower k-mer size         |  | 21                                                  | 25          | 29          | <b>33</b>   | 37    | 41    | 45         |            |       |       |       |       |        |  |
| Transcripts              |  | 70814                                               | 71625       | 72355       | 73185       | 74161 | 75399 | 76977      |            |       |       |       |       |        |  |
| Misassemblies            |  | 443                                                 | 332         | 284         | 250         | 231   | 229   | <b>206</b> |            |       |       |       |       |        |  |
| Database coverage, %     |  | 19.5                                                | <b>19.8</b> | <b>19.8</b> | 19.7        | 19.7  | 19.6  | 19.5       |            |       |       |       |       |        |  |
| 50%-assembled genes      |  | 7245                                                | <b>7273</b> | 7217        | 7142        | 7074  | 6992  | 6890       |            |       |       |       |       |        |  |
| 95%-assembled genes      |  | 2667                                                | <b>2681</b> | 2660        | 2593        | 2537  | 2472  | 2393       |            |       |       |       |       |        |  |

Table S11: rnaSPAdes performance with different  $k$ -mer sizes on Human dataset (150 bp long paired-end reads). Upper part of the table contains results for single- $k$  runs. Lower part shows rnaSPAdes performance for different lower  $k$  values with fixed upper one (73). Default  $k$ -mer sizes and the best values for each metric are highlighted with bold. *Note, that these experiments were performed during rnaSPAdes development and thus results may not be exactly the same as in comparison tables.*

| <b>Single k-mer size</b>                            | 31          | 37           | 43          | 49     | 55     | 61     | 67     | <b>73</b>    | 79     | 85     |
|-----------------------------------------------------|-------------|--------------|-------------|--------|--------|--------|--------|--------------|--------|--------|
| Transcripts                                         | 210121      | 212907       | 214312      | 213817 | 215063 | 216767 | 219770 | 223354       | 229623 | 237872 |
| Misassemblies                                       | 4720        | 4347         | 3804        | 3403   | 3032   | 2624   | 2369   | <b>2145</b>  | 2284   | 2732   |
| Database coverage, %                                | 20.7        | 21           | <b>21.1</b> | 21     | 20.8   | 20.9   | 20.7   | 20.8         | 20.7   | 20.6   |
| 50%-assembled genes                                 | 12712       | 12945        | 13120       | 13177  | 13239  | 13350  | 13353  | <b>13368</b> | 13289  | 13204  |
| 95%-assembled genes                                 | 5107        | 5420         | 5679        | 5859   | 6067   | 6230   | 6255   | <b>6317</b>  | 6212   | 6021   |
| <b>Iterative run with fixed upper k-mer size 73</b> |             |              |             |        |        |        |        |              |        |        |
| Lower k-mer size                                    | 25          | 31           | 37          | 43     | 49     | 55     | 61     | 67           |        |        |
| Transcripts                                         | 225165      | 224457       | 222862      | 221591 | 221268 | 220526 | 220554 | 221764       |        |        |
| Misassemblies                                       | 2771        | 2841         | 2981        | 2869   | 2709   | 2679   | 2462   | <b>2314</b>  |        |        |
| Database coverage, %                                | <b>20.9</b> | <b>20.9</b>  | 20.8        | 20.8   | 20.8   | 20.8   | 20.8   | 20.8         |        |        |
| 50%-assembled genes                                 | 13459       | <b>13498</b> | 13454       | 13463  | 13468  | 13445  | 13469  | 13427        |        |        |
| 95%-assembled genes                                 | <b>6376</b> | 6372         | 6368        | 6326   | 6333   | 6302   | 6307   | 6288         |        |        |

Table S12: Comparison between simplification procedures of SPAdes and rnaSPAdes on Mouse, Worm and Human datasets. The table shows the number of erroneous/correct edges and  $k$ -mers in the initial de Bruijn graph and the final assembly graphs constructed by SPAdes and rnaSPAdes. A  $k$ -mer is considered to be correct if it has exact match to a reference transcript. The edge is defined as erroneous if it has less than a half non-reference  $k$ -mers.

The table demonstrates that rnaSPAdes simplification algorithms typically preserve more reference  $k$ -mers, which allow to restore more isoforms. At the same time, in some cases it also keeps more erroneous  $k$ -mers in the graph. However, a major fraction of these  $k$ -mers are contained in short isolated edges, which are removed by SPAdes simplification algorithms, but preserved by rnaSPAdes. However, in rnaSPAdes such edges are removed later during the path filtration step and thus do not affect the assembly quality.

|                     | Initial graph | SPAdes simplification | rnaSPAdes simplification | Difference |
|---------------------|---------------|-----------------------|--------------------------|------------|
| <i>M. musculus</i>  |               |                       |                          |            |
| Correct $k$ -mers   | 31322711      | 30669080              | 30734404                 | 65324      |
| Correct edges       | 1578840       | 173086                | 171635                   | -1451      |
| Erroneous $k$ -mers | 40617576      | 15727283              | 15495169                 | -232114    |
| Erroneous edges     | 3080748       | 269288                | 260604                   | -8684      |
| <i>C. elegans</i>   |               |                       |                          |            |
| Correct $k$ -mers   | 19083410      | 18749538              | 18792620                 | 43082      |
| Correct edges       | 1587285       | 52932                 | 54133                    | 1201       |
| Erroneous $k$ -mers | 19635777      | 4855550               | 4893985                  | 38435      |
| Erroneous edges     | 2628040       | 67948                 | 68326                    | 378        |
| <i>H. sapiens</i>   |               |                       |                          |            |
| Correct $k$ -mers   | 59669678      | 55575499              | 55647509                 | 72010      |
| Correct edges       | 2807476       | 125508                | 122740                   | -2768      |
| Erroneous $k$ -mers | 236599327     | 143949729             | 143970896                | 21167      |
| Erroneous edges     | 7322492       | 1205761               | 1204244                  | -1517      |

Table S13: Exact parameters for filtering constructed paths. The path is removed if it satisfies one of the following conditions: (i) the path is shorter than  $min\_len$ , (ii) the path is shorter than  $relative\_min\_len \cdot read\_length$ , (iii) the path has coverage lower than  $min\_cov$  and is shorter than  $cov\_min\_len$  or  $cov\_rel\_min\_len \cdot read\_length$ , (iii) the path contains a single isolated edge, which has coverage lower than  $iso\_min\_cov$  and is shorter than  $iso\_min\_len$  or  $iso\_rel\_min\_len \cdot read\_length$ .

| Filtration level     | Parameter value |        |      |
|----------------------|-----------------|--------|------|
|                      | Soft            | Normal | Hard |
| $min\_length$        | 95              | 110    | 130  |
| $relative\_min\_len$ | 1.05            | 1.3    | 1.5  |
| $min\_cov$           | 1               | 2      | 3    |
| $cov\_min\_len$      | 130             | 140    | 180  |
| $cov\_rel\_min\_len$ | 1.5             | 1.6    | 2.0  |
| $iso\_min\_cov$      | 2               | 4      | 8    |
| $iso\_min\_len$      | 100             | 130    | 180  |
| $iso\_rel\_min\_len$ | 1.2             | 1.5    | 2.0  |

Table S14: Comparison of different rnaSPAdes filtration levels on Human and Arabidopsis SS data. Relaxed filtration parameters result in higher database coverage and larger number of 50%/95%-assembled genes/isoforms, but at the same time increases the number of misassembled sequences and the total amount of assembled contigs.

| Dataset                | Human        |        |             | Arabidopsis SS |        |            |
|------------------------|--------------|--------|-------------|----------------|--------|------------|
|                        | Soft         | Normal | Hard        | Soft           | Normal | Hard       |
| Transcripts            | 215997       | 167884 | 120219      | 95004          | 65063  | 54291      |
| Misassemblies          | 2209         | 2111   | <b>2033</b> | 610            | 571    | <b>562</b> |
| Database coverage, %   | <b>0.217</b> | 0.213  | 0.208       | <b>0.576</b>   | 0.571  | 0.566      |
| 50%-assembled genes    | <b>13467</b> | 13377  | 13218       | <b>20223</b>   | 20190  | 20135      |
| 95%-assembled genes    | <b>7112</b>  | 7094   | 7064        | <b>16224</b>   | 16217  | 16205      |
| 50%-assembled isoforms | <b>18736</b> | 18619  | 18392       | <b>21723</b>   | 21690  | 21635      |
| 95%-assembled isoforms | <b>8044</b>  | 8026   | 7996        | <b>16966</b>   | 16959  | 16947      |

Table S15: Amount of genes and isoforms detected by kallisto (Bray *et al.*, 2016) that have nucleotide coverage higher than respective threshold. Per-base coverage value for each gene/isoform was estimated as  $2 \times RL \times C/GL$ , where  $RL$  is read length,  $GL$  is gene/isoform length and  $C$  is the fragment counts reported by kallisto (for paired-end reads each fragment contains two reads).

| Coverage cut-off | 2     | 3     | 4     | 5     | 10    | 20    | 30    |
|------------------|-------|-------|-------|-------|-------|-------|-------|
| <b>Genes</b>     |       |       |       |       |       |       |       |
| Human simulated  | 15969 | 14936 | 14216 | 13700 | 12121 | 10523 | 9359  |
| Mouse simulated  | 11072 | 9776  | 8732  | 7828  | 4996  | 2751  | 1832  |
| Human            | 19875 | 17911 | 16601 | 15650 | 13009 | 10711 | 9261  |
| Human large      | 23880 | 21709 | 20212 | 19071 | 15916 | 13132 | 11693 |
| Mouse            | 10641 | 9373  | 8337  | 7450  | 4692  | 2585  | 1706  |
| Worm             | 13600 | 12650 | 12047 | 11577 | 10253 | 8962  | 8172  |
| Corn SS          | 21331 | 19877 | 18764 | 17869 | 14996 | 11681 | 9617  |
| Arabidopsis SS   | 23264 | 22825 | 22483 | 22223 | 21360 | 20378 | 19643 |
| <b>Isoforms</b>  |       |       |       |       |       |       |       |
| Human simulated  | 55182 | 48844 | 44061 | 40401 | 29702 | 20800 | 16332 |
| Mouse simulated  | 17334 | 14150 | 11989 | 10334 | 6017  | 3159  | 2081  |
| Human            | 66806 | 57677 | 51269 | 46205 | 32235 | 21283 | 16132 |
| Human large      | 82165 | 73504 | 67295 | 62521 | 48376 | 35429 | 28816 |
| Mouse            | 15788 | 12746 | 10762 | 9318  | 5470  | 2891  | 1877  |
| Worm             | 18131 | 16810 | 15943 | 15268 | 13294 | 11344 | 10130 |
| Corn SS          | 31907 | 28879 | 26611 | 24805 | 19085 | 13641 | 10859 |
| Arabidopsis SS   | 29653 | 29008 | 28482 | 28063 | 26538 | 24687 | 23358 |



## References

- Andrews, S. *et al.* (2010). Fastqc: a quality control tool for high throughput sequence data.
- Bolger, A. M., Lohse, M., and Usadel, B. (2014). Trimmomatic: a flexible trimmer for illumina sequence data. *Bioinformatics*, **30**(15), 2114–2120.
- Bray, N. L., Pimentel, H., Melsted, P., and Pachter, L. (2016). Near-optimal probabilistic rna-seq quantification. *Nature biotechnology*, **34**(5), 525.
- Bushmanova, E. *et al.* (2016). rnaQUAST: a quality assessment tool for de novo transcriptome assemblies. *Bioinformatics*, **32**(14), 2210–2212.
- Camacho, C. *et al.* (2009). Blast+: architecture and applications. *BMC bioinformatics*, **10**(1), 421.
- Chang, Z., Li, G., Liu, J., Zhang, Y., Ashby, C., Liu, D., Cramer, C. L., and Huang, X. (2015). Bridger: a new framework for de novo transcriptome assembly using rna-seq data. *Genome biology*, **16**(1), 30.
- Grabherr, M. G. *et al.* (2011). Full-length transcriptome assembly from RNA-Seq data without a reference genome. *Nat. Biotechnol.*, **29**(7), 644–652.
- Kent, W. J. (2002). BLAT—the BLAST-like alignment tool. *Genome Res.*, **12**(4), 656–664.
- Langmead, B. and Salzberg, S. (2012). Fast gapped-read alignment with bowtie 2. *Nature Methods*, **9**, 357–359.
- Li, B. *et al.* (2014). Evaluation of de novo transcriptome assemblies from RNA-Seq data. *Genome Biol.*, **15**(12), 553.
- Liu, J., Li, G., Chang, Z., Yu, T., Liu, B., McMullen, R., Chen, P., and Huang, X. (2016). Binpacker: packing-based de novo transcriptome assembly from rna-seq data. *PLoS computational biology*, **12**(2), e1004772.
- Marçais, G. and Kingsford, C. (2011). A fast, lock-free approach for efficient parallel counting of occurrences of k-mers. *Bioinformatics*, **27**(6), 764–770.
- Nip, K. M. (2017). *RNA-Bloom: de novo RNA-seq assembly with Bloom filters*. Ph.D. thesis, University of British Columbia.
- Patro, R., Duggal, G., Love, M. I., Irizarry, R. A., and Kingsford, C. (2017). Salmon provides fast and bias-aware quantification of transcript expression. *Nature methods*, **14**(4), 417.
- Peng, Y. *et al.* (2013). IDBA-tran: a more robust de novo de bruijn graph assembler for transcriptomes with uneven expression levels. *Bioinformatics*, **29**(13), i326–i334.
- Robertson, G. *et al.* (2010). De novo assembly and analysis of RNA-seq data. *Nat. Methods*, **7**(11), 909–912.
- Simão, F. A. *et al.* (2015). BUSCO: assessing genome assembly and annotation completeness with single-copy orthologs. *Bioinformatics*, **31**(19), 3210–3212.
- Smith-Unna, R. *et al.* (2016). TransRate: reference-free quality assessment of de novo transcriptome assemblies. *Genome research*, **2**(8), 1134–1144.
- Tang, S., Lomsadze, A., and Borodovsky, M. (2015). Identification of protein coding regions in rna transcripts. *Nucleic acids research*, **43**(12), e78–e78.
- Wu, T. D. and Watanabe, C. K. (2005). GMAP: a genomic mapping and alignment program for mRNA and EST sequences. *Bioinformatics*, **21**(9), 1859–1875.
- Xie, Y. *et al.* (2014). SOAPdenovo-Trans: De novo transcriptome assembly with short rna-seq reads. *Bioinformatics*, page btu077.
- Zaharia, M., Bolosky, W. J., Curtis, K., Fox, A., Patterson, D., Shenker, S., Stoica, I., Karp, R. M., and Sittler, T. (2011). Faster and more accurate sequence alignment with snap. *arXiv preprint arXiv:1111.5572*.
